# Supplementary material for: TiN as a simple and efficient polysulfide immobilizer for lithium–sulfur batteries
Source: Royal Society of Chemistry journal article supplement (doi:10.1039/c6ta07411a), 2016-01-01
Supplement: c6ta07411a1.pdf [file c6ta07411a1.pdf]

### Supplementary Information for:

## TiN as a simple and efficient polysulfide immobilizer for lithium–sulfur batteries

Zhangxiang Hao, Lixia Yuan,\* Chaoji Chen, Jingwei Xiang, Yuyu Li, Zhimei Huang,

Pei Hu, Yunhui Huang\*

State Key Laboratory of Material Processing and Die & Mould Technology, School of

Materials Science and Engineering, Huazhong University of Science and Technology,

Wuhan, Hubei 430074, China

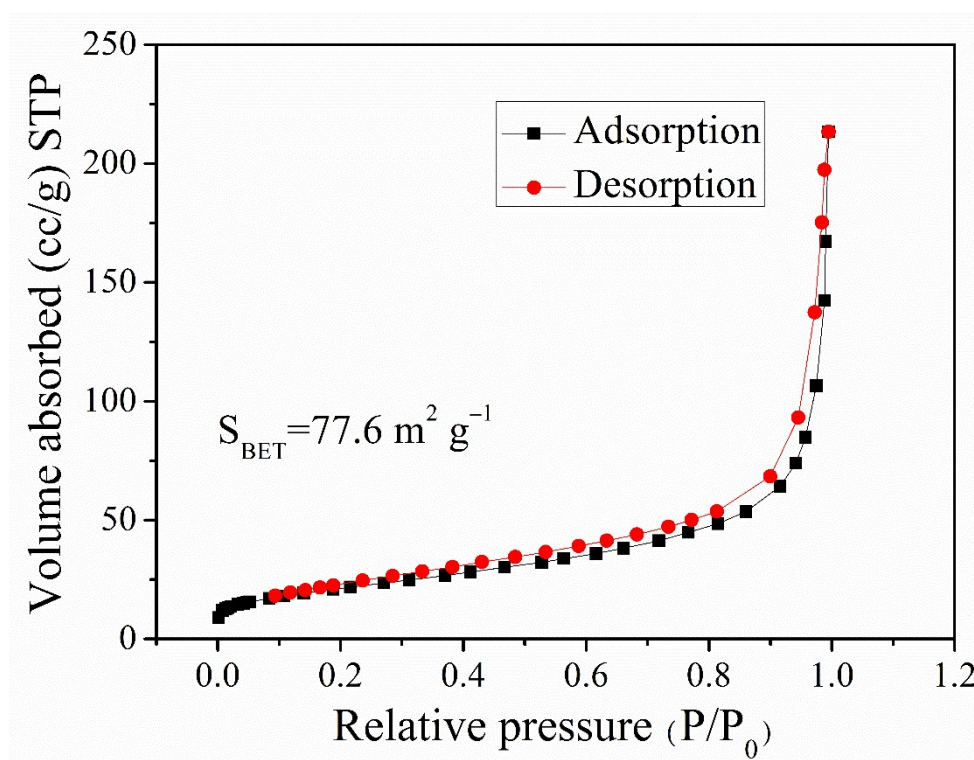

Figure S1 N<sub>2</sub> adsorption/desorption isotherms for commercial TiN.

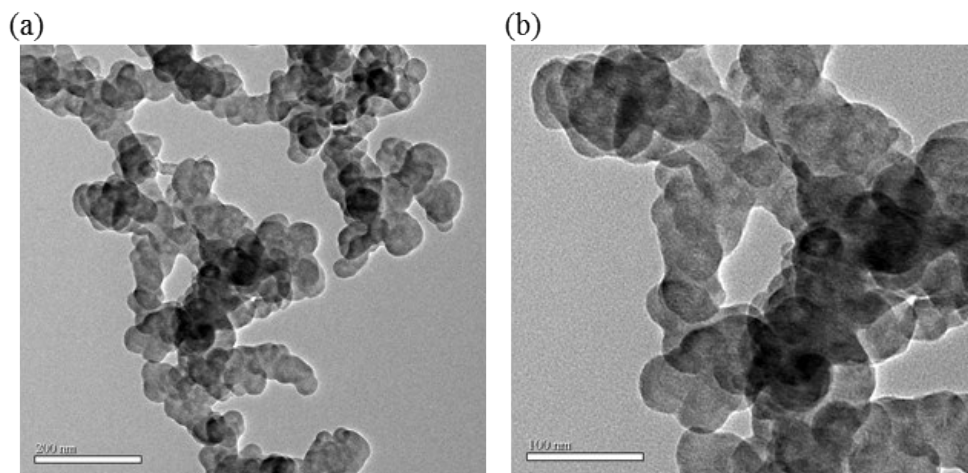

Figure S2 (a) and (b) Transmission electron microscopy (TEM) of super P.

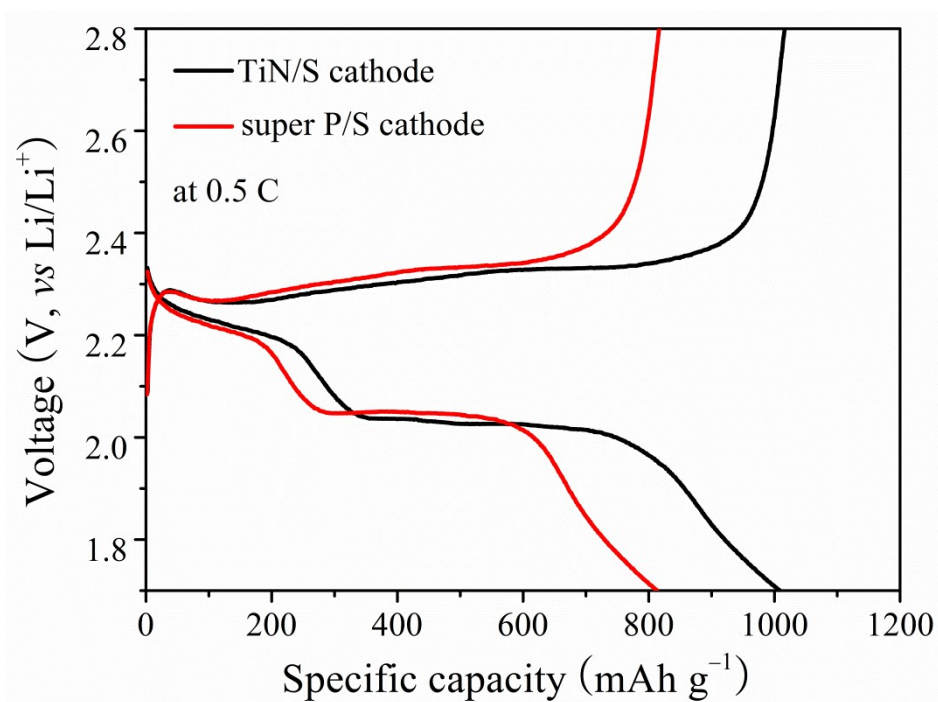

Figure S3 Discharge/charge profiles of TiN/S and super P/S cathode at 0.5 C.

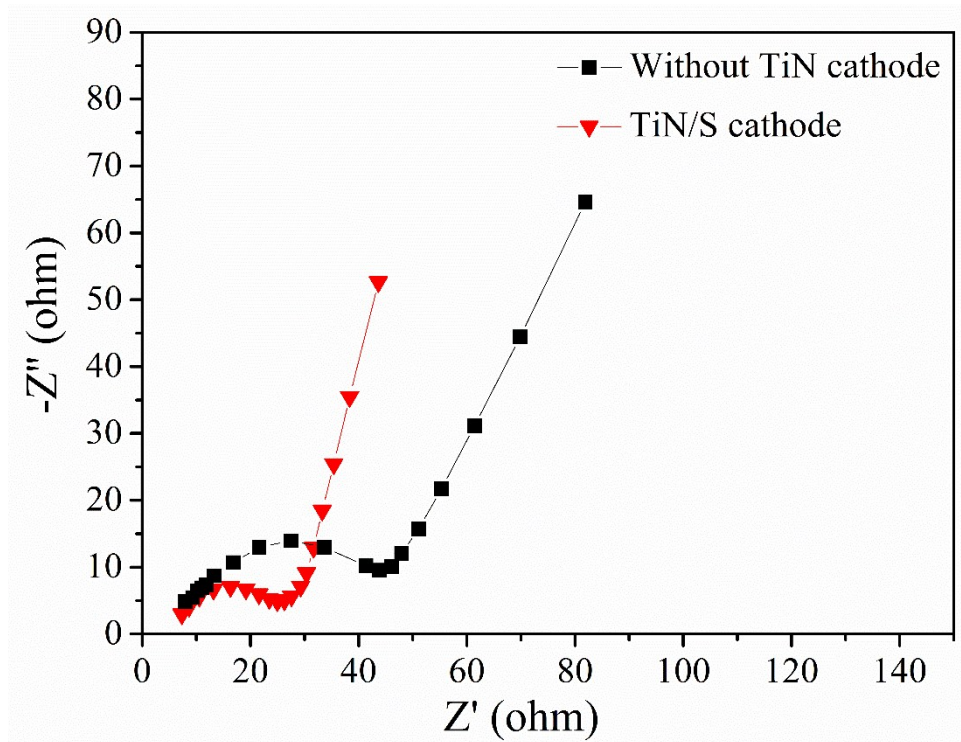

Figure S4 Electrochemical impedance spectra of TiN/S and without TiN cathode.

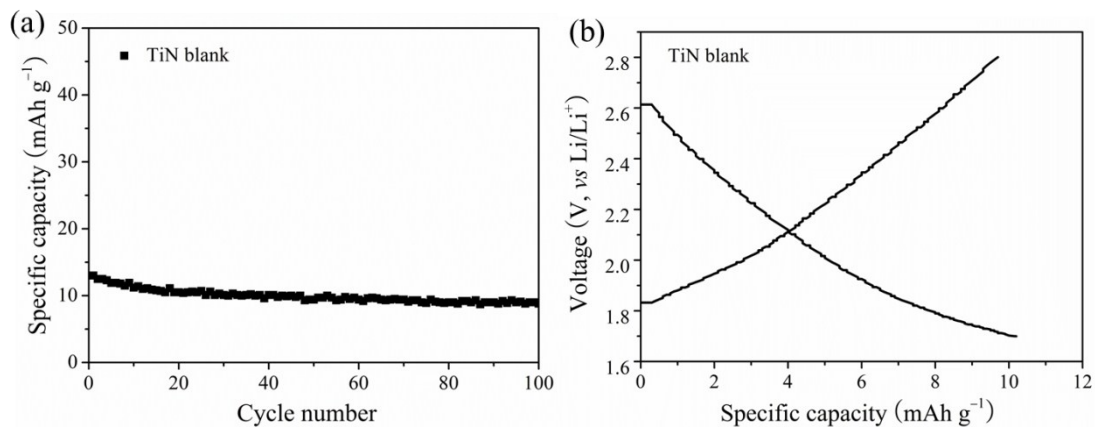

Figure S5 (a) cycling performance and (b) discharge/charge profiles of blank TiN (without sulfur) as a cathode material, carried out at a current density of  $111.1 \text{ mA g}^{-1}$ .

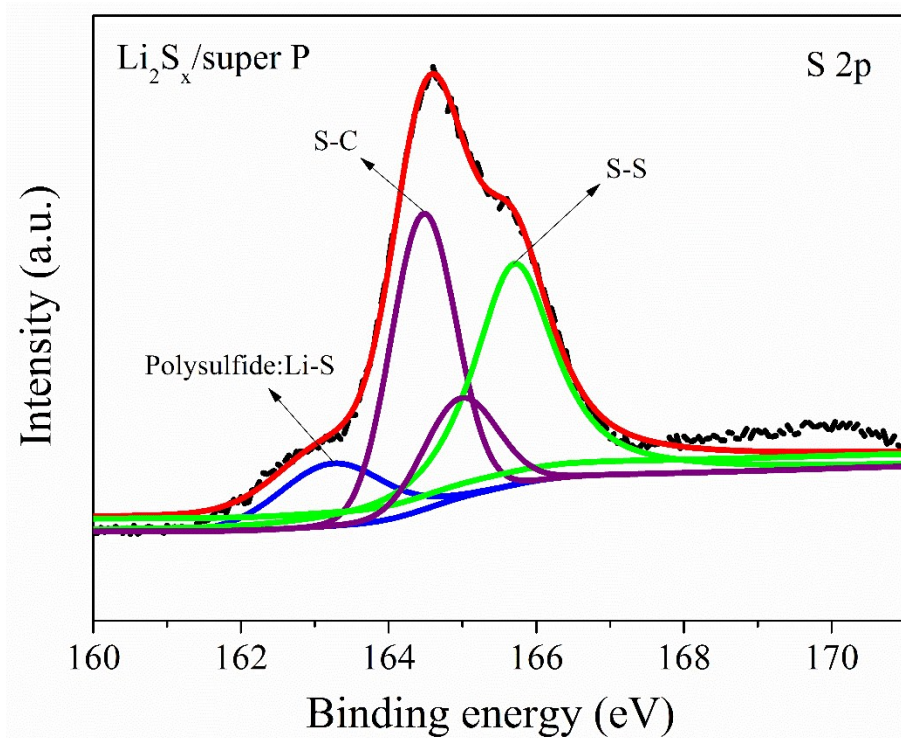

Figure S6 XPS S 2p spectra of  $\text{Li}_2\text{S}_x/\text{super P}$ .
